# Supplementary material for: Bovine leukemia virus DNA associated with breast cancer in women from South Brazil
Source: PubMed Central journal article supplement (PMC6393560; doi:10.1038/s41598-019-39834-7), 2019-02-27
Supplement: 41598_2019_39834_MOESM1_ESM.pdf [file 41598_2019_39834_MOESM1_ESM.pdf]

22 Supplementary figure S1. Original gel electrophoresis picture depicting GAPDH and BLV  
23 DNA fragments obtained after PCR assay on mammary tissue (Figure 2 on the article). In  
24 the article we show a clipping of this figure in which we removed the DNA ladder marker  
25 at the right side of the picture and the empty lane prior to the marker.

26

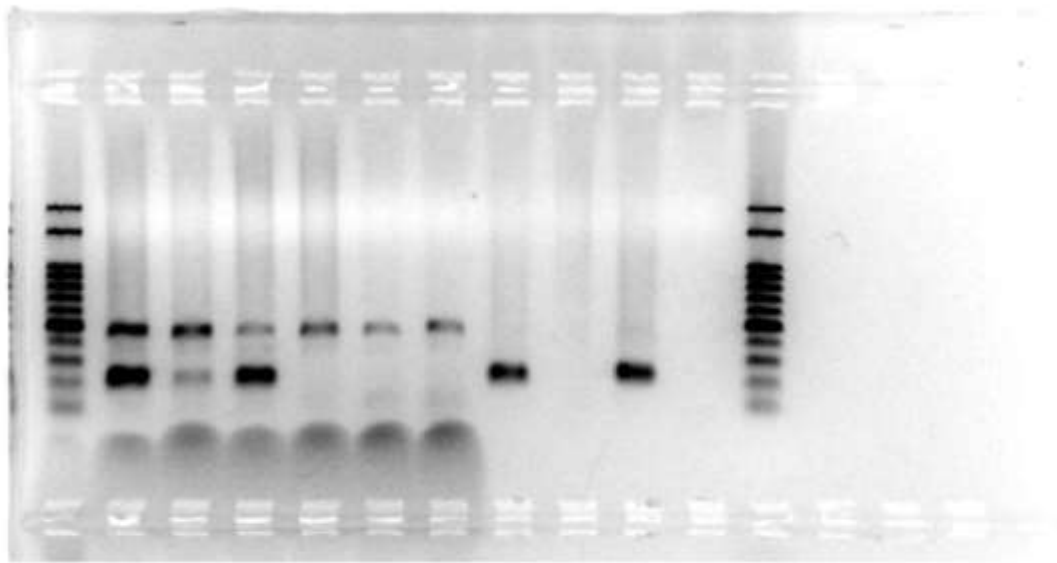

27
